# Supplementary material for: Flood Analysis Using HEC-RAS and HEC-HMS: A Case Study of Khazir River (Middle East—Northern Iraq)
Source: MDPI journal article supplement (doi:10.3390/w14223779), 2022-11-21
Supplement: s1 [file s1]

**Table S1.** Discharge data of the Khazir River for the period 2004-2021.

| <b>Years</b> | <b>Year discharge<br/>Average (m<sup>3</sup>/sec)</b> | <b>Top discharge<br/>(m<sup>3</sup>/sec)</b> | <b>Day</b> | <b>Lowest discharge<br/>(m<sup>3</sup>/sec)</b> | <b>Day</b> |
|--------------|-------------------------------------------------------|----------------------------------------------|------------|-------------------------------------------------|------------|
| 2004         | 14.93                                                 | 101.576                                      | 24-Jan-04  | 6.55                                            | 1-Oct-04   |
| 2005         | 12.85                                                 | 74.848                                       | 21-Feb-05  | 5.777                                           | 5-Sep-05   |
| 2006         | 17.52                                                 | 320.885                                      | 26-Jan-06  | 4.457                                           | 4-Oct-06   |
| 2007         | 11.99                                                 | 412.101                                      | 6-Feb-07   | 4.055                                           | 7-Oct-07   |
| 2008         | 7.82                                                  | 32.422                                       | 25-Feb-08  | 1.998                                           | 10-Aug-08  |
| 2009         | 14.42                                                 | 354.65                                       | 20-Jan-09  | 1.998                                           | 1-Aug-09   |
| 2010         | 14.42                                                 | 204.937                                      | 18-Jan-10  | 1.998                                           | 4-Jul-10   |
| 2011         | 13.64                                                 | 281.188                                      | 31-Jan-11  | 3.598                                           | 4-Sep-11   |
| 2012         | 7.21                                                  | 173.902                                      | 21-Dec-12  | 2.998                                           | 11-Sep-12  |
| 2013         | 10.95                                                 | 372.15                                       | 29-Jan-13  | 4.59                                            | 31-Aug-13  |
| 2014         | 13.73                                                 | 506.16                                       | 28-Jan-14  | 5.94                                            | 8-Sep-14   |
| 2015         | 9.67                                                  | 47.67                                        | 8-Jan-15   | 5.62                                            | 31-Jul-15  |
| 2016         | 14.44                                                 | 177.32                                       | 1-Jan-16   | 5.62                                            | 11-Sep-16  |
| 2017         | 9.39                                                  | 136.41                                       | 17-Mar-17  | 5.02                                            | 30-Aug-17  |
| 2018         | 15.40                                                 | 506.16                                       | 1-Dec-18   | 4.73                                            | 26-Aug-18  |
| 2019         | 25.12                                                 | 237.77                                       | 18-Mar-19  | 8.07                                            | 27-Aug-19  |
| 2020         | 14.24                                                 | 108.28                                       | 31-Jan-20  | 6.68                                            | 5-Sep-20   |
| 2021         | 13.23                                                 | 31.51                                        | 18-Jan-21  | 4.06                                            | 8-Aug-21   |
